# Supplementary material for: Solvothermal synthesis of pyrite FeS2nanocubes and their superior high rate lithium storage properties
Source: Royal Society of Chemistry journal article supplement (doi:10.1039/c4ra08527b), 2014-09-26
Supplement: c4ra08527b1.pdf [file c4ra08527b1.pdf]

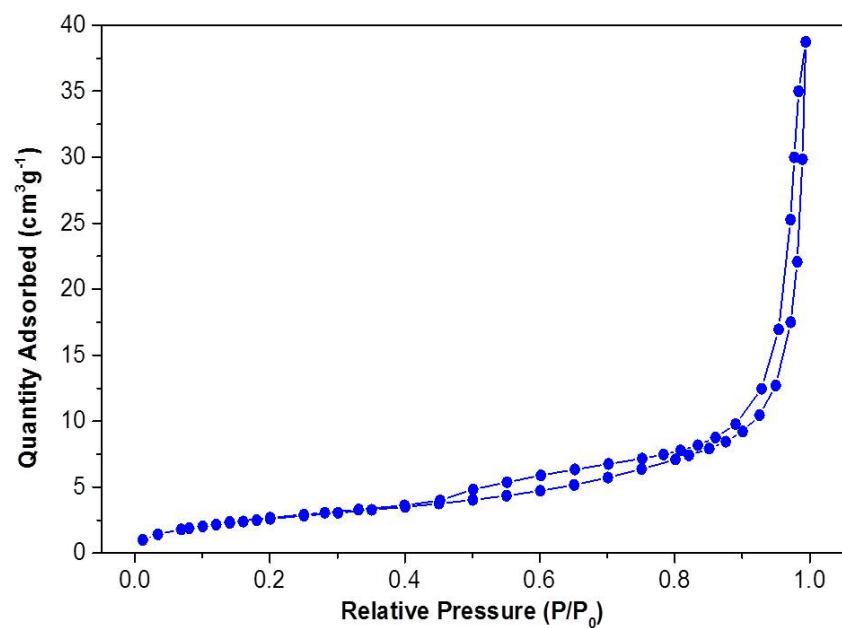

Figure S1: Nitrogen adsorption/desorption isotherm for the as-synthesized pyrite FeS<sub>2</sub> after solvothermal reaction at 180 °C for 18 h.

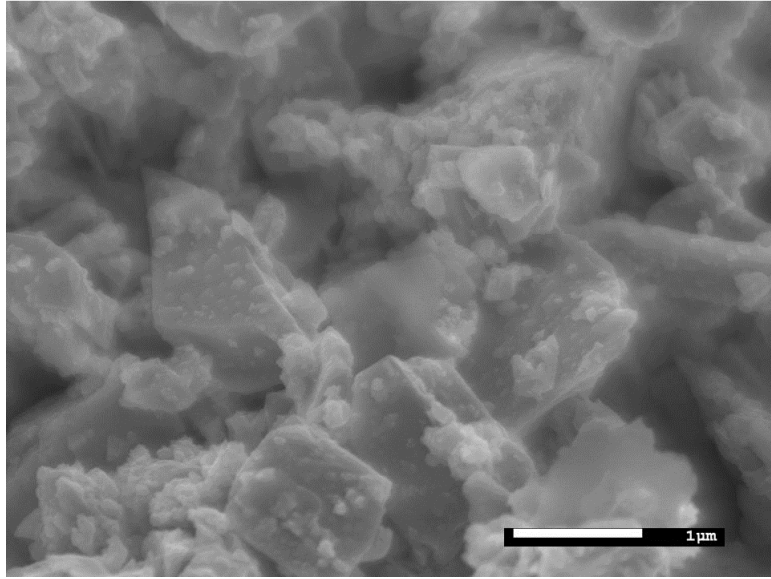

Figure S2: FESEM of the grinded commercial iron pyrite mineral.

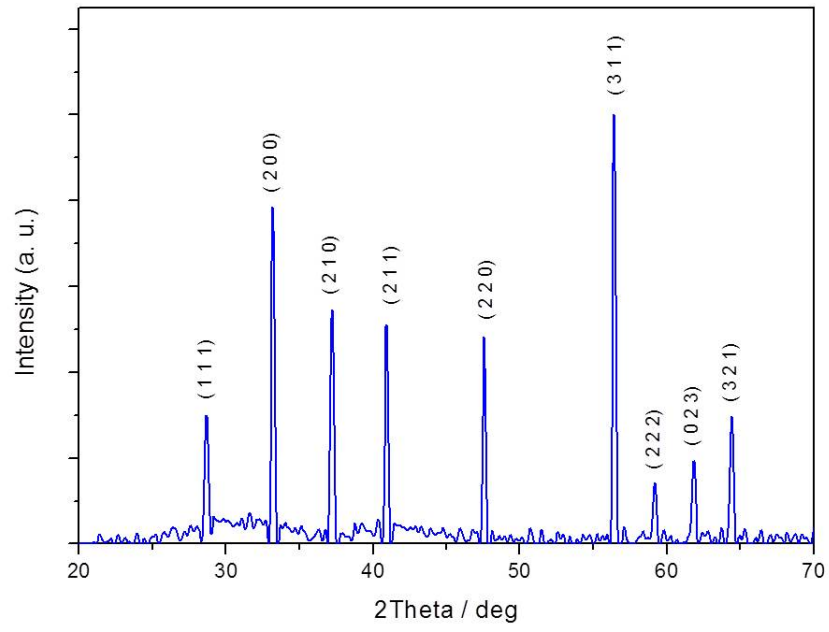

Figure S3: XRD pattern of the grinded commercial iron pyrite mineral.
